# Supplementary material
Source: publisher site journal article supplement (https://www.spandidos-publications.com/6258/downloadSupplementary)

Figure S1. Correlations of CEA and CA15-3 with TRACP-5b. Pearson's correlation coefficients and P-values are indicated. CA15-3, cancer antigen 15-3; CEA, carcinoembryonic antigen; TRACP-5b, tartrate-resistant acid phosphatase 5b.

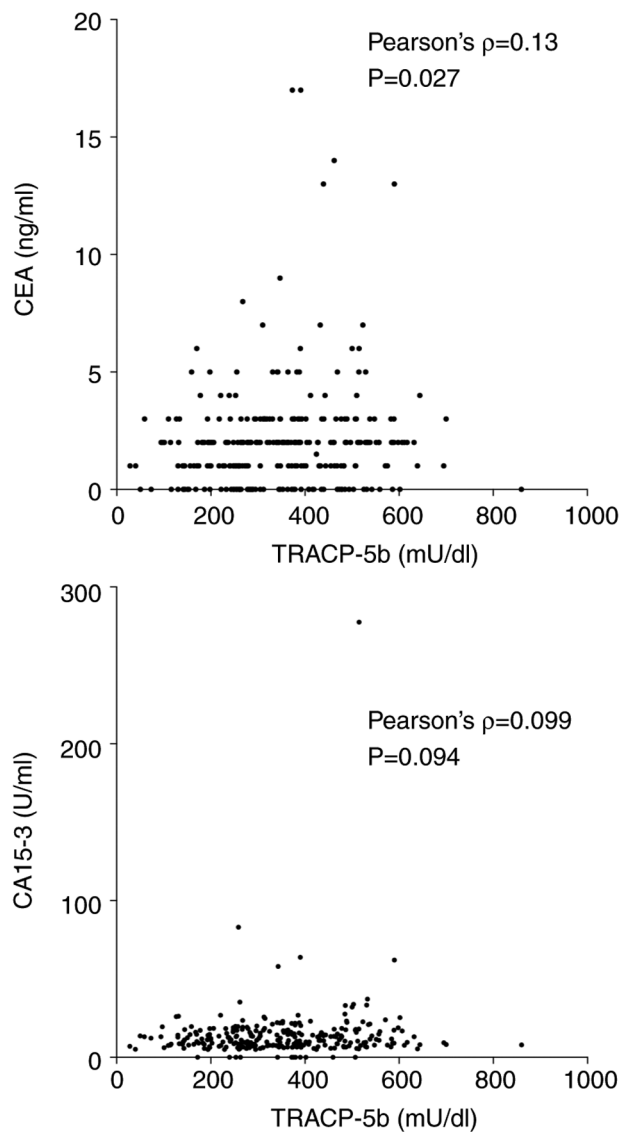

Supplement: Supplementary file 1 [file downloadSupplementary]
